# Supplementary material
Source: Springer Nature journal article supplement (https://www.springermedizin.de/resource/supplementary/12901_2012_90_MOESM1_ESM.pdf/9515192)

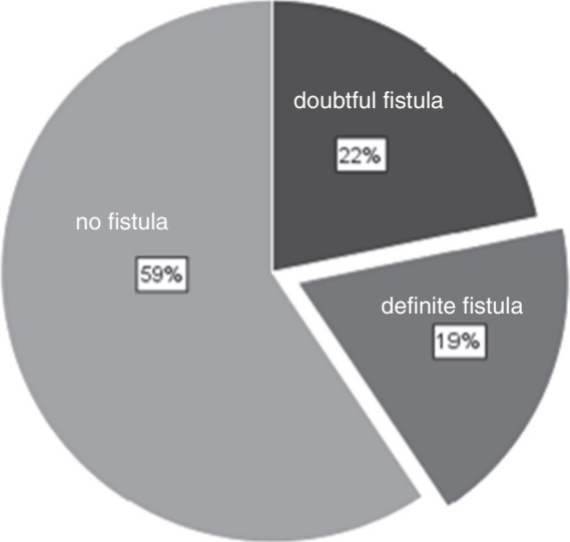

Supplement: MOESM1 [file 9515192]
